# Supplementary material for: Fabrication of an efficient bifunctional acid catalyst based on MIL-88B(Fe) for solvent-free ring-opening of epoxides with alcohols
Source: Royal Society of Chemistry journal article supplement (doi:10.1039/d4ce01072h), 2025-01-01
Supplement: d4ce01072h1.pdf [file d4ce01072h1.pdf]

## **Fabrication of an efficient bifunctional acid catalyst based on MIL-88B(Fe) for solvent-free ring-opening of epoxides with alcohols**

Mahdiyeh-Sadat Hosseini<sup>a</sup>, Alireza Abbasi<sup>a\*</sup>, Peyman Ghorbani<sup>a</sup>, Majid Masteri-Farahani<sup>b</sup>

<sup>a</sup>School of Chemistry, College of Science, University of Tehran, P.O. Box: 14155-6455, Tehran, Iran

<sup>b</sup>Faculty of Chemistry, Kharazmi University, P.O. Box: 15719-14911, Tehran, Iran

---

### **Experimental section**

#### **Materials and methods**

All chemicals including FeCl<sub>3</sub>.6H<sub>2</sub>O, terephthalic acid, sulfamic acid, styrene oxide, 1,2-epoxypropane, 1,2-epoxybutane, epichlorohydrine, cyclohexene oxide, dimethylformamide, methanol, ethanol, n-butanol, n-hexanol, and n-octanol were provided from Merck and Biochem chemical companies and used without further purification.

Fourier transform infrared (FT-IR) was conducted using Perkin–Elmer Spectrum RXI FT-IR spectrometer by using KBr pellets diluted with synthesized materials. The X-ray diffraction patterns (XRD) were recorded by DX-2700BH multi-function diffractometer using Cu  $\alpha$  radiation at  $\lambda = 1.54 \text{ \AA}$  in the  $2\theta$  range of 5–45°, with the step size of 0.05° and time per step of 1sec. Field emission scanning electron microscopy (FESEM) was carried out by TESCAN MIRA III instrument coupled to energy-dispersive X-ray spectroscopy (EDX) for micro-elemental analysis and mapping. The nitrogen adsorption-desorption isotherms with surface area measurement were performed by BELSORP MINI II instrument from BEL Company with a BEL PREP VAC II degassing device. The surface area was achieved by Brunauer-Emmett-Teller (BET) calculation. The thermogravimetric analysis (TGA) was performed by TGA Q600 instrument (TA

Company, USA). The progress of catalytic reactions was controlled by Agilent 6890N gas chromatography equipped with a capillary column (HP-5) and FID detector.

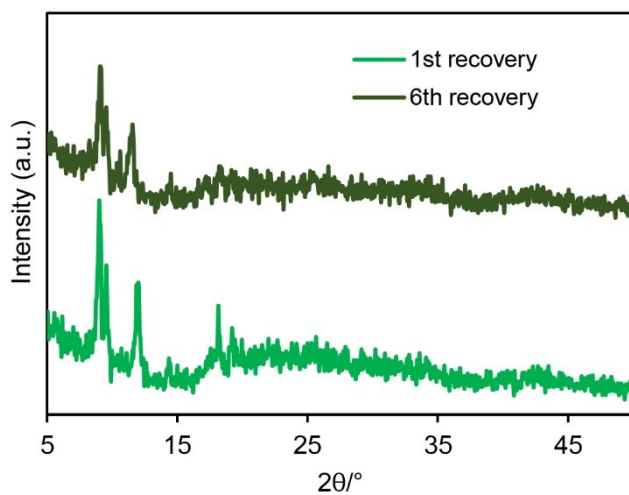

**Fig. S1.** The XRD pattern of reused MIL-88B(Fe)/SA.

**Table S1.** Approximate size of different epoxides and corresponding products.

| Epoxides                                                                           | Approximate size (Å) | Products                                                                           | Approximate size (Å) |
|------------------------------------------------------------------------------------|----------------------|------------------------------------------------------------------------------------|----------------------|
| 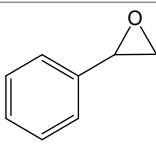  | 5.9                  |  | 6                    |
|   | 3.5                  |   | 5.8                  |
|   | 4.3                  |  | 5.5                  |
|   | 4.4                  |  | 5.3                  |
|  | 4.1                  |  | 6.2                  |
